# Supplementary material for: How size and trigger matter: analyzing rainfall- and earthquake-triggered landslide inventories and their causal relation in the Koshi River basin, Central Himalaya
Source: Copernicus journal article supplement (doi:10.5194/nhess-2018-109), 2018-06-12
Supplement: Supplementary file [file nhess-2018-109-AC2-supplement.zip]

# How size and trigger matter: analyzing rainfall- and earthquake-triggered landslide inventories and their causal relation in the Koshi River basin, Central Himalaya

Jianqiang Zhang<sup>1,2</sup>, Cees J. van Westen<sup>2</sup>, Hakan Tanyas<sup>2</sup>, Olga Mavrouli<sup>2</sup>, Yonggang Ge<sup>1</sup>, Samjwal Bajrachary<sup>3</sup>,  
Deo Raj Gurung<sup>3</sup>, Megh Raj Dhital<sup>4</sup>, Narendral Raj Khanal<sup>5</sup>

<sup>1</sup>Key Laboratory of Mountain Hazards and Surface Process/Institute of Mountain Hazards and Environment, Chinese Academy of Sciences, Chengdu, China.

<sup>2</sup>Faculty of Geo-Information Science and Earth Observation (ITC), University of Twente, the Netherlands.

<sup>3</sup>International Centre for Integrated Mountain Development (ICIMOD), Lalitpur, Nepal.

<sup>4</sup>The Department of Geology, Tri-Chandra Multiple Campus, Ghantaghar, Kathmandu, Nepal.

<sup>5</sup>Central Department of Geography, Tribhuvan University, Kathmandu, Nepal.

*Correspondence to:* Jianqiang Zhang(zhangjq@imde.ac.cn)

**Abstract:** Inventories of landslides caused by different triggering mechanisms, such as earthquakes, extreme rainfall events or anthropogenic activities, may show different characteristics in terms of distribution, contributing factors and frequency-area relationships. The aim of this research is to study such differences in landslide inventories, and the effect they have on landslide susceptibility assessment. The study area is the watershed of the trans-boundary Koshi River in central Himalaya, shared by China, Nepal and India. Detailed landslide inventories were generated based on visual interpretation of remote sensing images and field investigation for different time periods and triggering mechanisms. Maps and images from the period 1992 to 2015 were used to map 5,858 rainfall-triggered landslides and after the 2015 Gorkha earthquake, an additional 14,127 co-seismic landslides were mapped. A set of topographic, geological and land cover factors were employed to analyze their correlation with different types and sizes of landslides. The results show that the frequency - area distributions of rainfall and earthquake-triggered landslides varied considerably, with the former one having a larger frequency of small landslides. Also topographic factors varied considerably for the two triggering events, with both elevation and slope angle showing significantly different patterns for earthquake-triggered and rainfall-triggered landslides. Landslides were classified into two size groups, in combination with the main triggering mechanism (rainfall- or earthquake-triggered). Susceptibility maps for different combinations of landslide size and triggering mechanism were generated using logistic regression analysis. The different triggers and sizes of landslide data were used to validate the models. The results showed that susceptible areas for small and large size rainfall- and earthquake-triggered landslides differed substantially, while susceptibility maps for different size of earthquake-triggered landslides were similar.

**Key words:** landslides, rainfall-triggered, earthquake-triggered, frequency-area analysis, susceptibility assessment,

34 Nepal

35

36 **1. Introduction**

37

38 Landslides are one of the most harmful geological hazards causing substantial fatalities and loss of property  
39 worldwide, affecting settlements, agriculture, transportation infrastructure and engineering projects (Dilley et al. 2005;  
40 Petley, 2012; Zhang et al., 2015; Haque et al., 2016). Among the various characteristics that determine the potential  
41 damage of landslides, size plays an important role, as well as velocity, depth, impact pressure, or displacement which  
42 differs for the various mass movement types. Volume may be an even more important landslide characteristic than size,  
43 but this is difficult to measure as it requires specific geophysical or geotechnical methods that can be applied at a site  
44 investigation level, or the use of multi-temporal Digital Elevation Models (SafeLand, 2015; Martha et al., 2017a).  
45 Therefore, empirical relations between landslide area and volume are generally used (Hovius et al, 1997; Dai and Lee,  
46 2001; Guzzetti et al., 2008; Larsen et al., 2011; Klar et al., 2011; Larsen and Montgomery, 2012). To investigate  
47 whether earthquake- and rainfall-triggered landslides inventories have similar area-frequency distributions, area-  
48 volume relations and spatially controlling factors, it is important to collect event-based landslide inventories. The  
49 difficulty is to collect complete inventories that are independent for earthquakes and rainfalls in same study area.

50 The quality of a landslide inventory can be indicated by its accuracy, which refers to the correctness in location and  
51 classification of the landslides, and its completeness, which measures how many of the total number of landslides in  
52 the field were actually mapped (Guzzetti et al., 2012). The accuracy and completeness have a large influence on the  
53 quality and reliability of the susceptibility and hazards maps that are either using the inventory as input (e.g. in  
54 statistical modelling) and in validation (e.g. statistical and physically-based modeling) (Li et al., 2014). There are  
55 several explanations why landslide inventories differ in frequency-area distribution, such as the under sampling of  
56 small slides (Stark and Hovius, 2001), or the amalgamation, the merging of several landslides into single polygons  
57 (Marc and Hovius 2015).

58 Landslides might be triggered by various processes, among which anthropogenic activities, volcanic processes, sudden  
59 temperature changes, earthquakes and extreme rainfall (Highland and Bobrowski, 2008). The latter two are the most  
60 frequently occurring, and causing the highest number of casualties (Keefer, 2002; Petley, 2012; Kirschbaum et al,  
61 2015; Froude and Petley, 2018). Comparing landslide inventories for the same area and for the same triggering event  
62 has been carried out by several authors (e.g. Pellicani and Spilotro, 2015; Tanyas et al., 2017a). Some studies took  
63 independent earthquake- and rainfall-triggered landslide inventories to compare the characteristics of landslides  
64 induced by different triggers. Malamud et al.(2004) compared earthquake-triggered landslides from the Northridge  
65 earthquake, Umbria snowmelt-triggered landslide and Guatemala rainfall-triggered landslide as examples, and

66 concluded that the three frequency-area distributions were in good agreement with each other. Meunier et al. (2008)  
67 compared earthquake-triggered landslides, from Northridge, Chi-Chi Finisterre Mountains (Papua New Guinea), to  
68 evaluate topographic site effects on the distribution of landslides. Tanyas et al. (2017b) created a database with 363  
69 landslide-triggering earthquakes and 64 digital landslide inventories, which were compared. The number of studies  
70 that compare earthquake-triggered landslide with rainfall triggered ones for the same area is less numerous. They are  
71 mostly focusing on mapping rainfall-induced landslides after an earthquake, such as for the 1999 Chi-Chi earthquake  
72 (Lin et al., 2006; 2008), the 2005 Kashmir earthquake (Saba et al., 2010) or the 2008 Wenchuan earthquake (Tang et al.  
73 2010; Marc et al, 2015; Tang et al., 2016; Fan et al., 2018a).

74 The problem with the studies indicated above is that rainfall-triggered landslides that occur shortly after a major  
75 earthquake are generally following the same spatial patterns, due to the availability of large volumes of landslide  
76 materials of the co-seismic landslides (Hovius et al., 2011; Marc et al., 2015; Tang et al., 2016; Fan et al., 2018a), so  
77 for the post-earthquake landslide susceptibility assessment, the location of the co-seismic landslides is a crucial factor..  
78 There are very few studies that have validated landslide susceptibility maps with independent landslide inventories of  
79 triggering events that occurred after the maps were produced. Chang et al. (2007) used landslides triggered by a major  
80 earthquake and a typhoon prior to the earthquake to develop an earthquake-induced model and a typhoon-induced  
81 model. The models were then validated by using landslides triggered by three typhoons after the earthquake.  
82 According to the results, typhoon-triggered landslides tended to be near stream channels and earthquake-triggered  
83 landslides were more likely to be near ridge lines. Although landslide size is often considered important in hazard and  
84 risk assessment, it is generally not considered as a separate component of the susceptibility assessment. The different  
85 relation with contributing factors of earthquake-triggered and rainfall-triggered landslides may also be related to the  
86 size distribution (Korup et al. 2007). For instance, Fan et al. (2012) concluded that small ( $<10 \times 10^4 \text{ m}^3$ ) rainfall-  
87 triggered landslide and earthquake-triggered landslides have similar runout distances, whereas for larger landslides  
88 earthquake-triggered ones showed longer runouts. Peng et al. (2014) analyzed the landslides in the Three Gorges area  
89 and found that different landslide sizes had different relations with contributing factors.

90 The aim of this study is to investigate the differences in the characteristics of earthquake-triggered and rainfall  
91 triggered landslides in terms of their frequency-area relationships, spatial distributions and relation with contributing  
92 factors, and to evaluate whether separate susceptibility maps generated for specific landslide sizes and triggering  
93 mechanism are better than a generic landslide susceptibility assessment including all landslide sizes and triggers. This  
94 research aims to address a number of questions related to the difference of using earthquake-induced and rainfall-  
95 induced landslide inventories for the generation of landslide susceptibility maps. The first question is whether different  
96 landslide size groups are controlled by different sets of contributing factors. The second question that will be addressed  
97 is whether it is possible to utilize inventories of earthquake-triggered landslides (ETL) as inputs for analyzing the

批注 [h1]: Reference paper was added below

98 susceptibility of rainfall-triggered landslides (RTL) and vice versa.

99

100

## 101 2. Study area

102

103 The study was carried out in the Koshi River basin, which is a trans-boundary basin located in China, Nepal and India  
104 in the central Himalayas (Fig. 1a). The mountainous regions in the upper reaches of the basin where landslides have  
105 occurred are located in China and Nepal, and the Indian part consists of relatively flat areas. The elevation of Koshi  
106 River basin varies from 60 m a.s.l. at the outlet in India up to 8,844 m at the highest point at Mount Everest. The  
107 Koshi basin can be classified into 6 physiographic zones from South to North: Terai, Siwalik Hills, Mahabharat Lekh,  
108 Middle Mountains, High Himalaya, and Tibetan Plateau (Gurung and Khanal 1987; Dhital 2015). Considering the  
109 distribution of landslides, the Tibetan plateau in the upper reaches and the plains in the lower reaches were excluded.

110 In the Koshi Basin, the major geological structures have an approximate east–west orientation, such as the foreland  
111 thrust-fold belt, Main Central Thrust (MCT), South Tibetan Detachment System (STDS) and the Yarlung Zangbo  
112 Suture Zone (YZSZ) (Gansser, 1964; Dhital, 2015). The southernmost part of the basin consists of the Quaternary  
113 sediments underlain by the Neogene Siwaliks. The Siwaliks comprise soft mudstones, sandstones and conglomerates.  
114 In this part of the foreland basin, a number of emergent and blind imbricate faults originate from the Main Himalayan  
115 Thrust. The overlying Lesser Himalayan succession forms duplexes and imbricate stacks. The Proterozoic to Miocene  
116 rocks of the Lesser Himalaya include limestones, dolomites, slates, phyllites, schists, quartzites, and gneisses (Dhital,  
117 2015). A regional-scale thrust MCT separates the Lesser Himalayan sequence from the overlying Higher Himalayan  
118 crystallines, which consist of medium- to high-grade metamorphic rocks (e.g., schists, quartzites, amphibolites,  
119 marbles, gneisses, and migmatites) and granites aged from the Proterozoic to Miocene. The STDS delineates the  
120 Higher Himalayan rocks from the overlying Tethyan sedimentary sequence of Paleozoic–Cenozoic age (Gansser, 1964;  
121 Burg et al., 1984; Hodges et al., 1996) (Fig. 1b).

122 In the study area there are three main tributaries of the Koshi River: the Arun (main branch) coming from the north, the  
123 Sun Koshi from the west and Tamor from the east. Nearly every year, during the monsoon period, which generally  
124 lasts from June to September, the area is affected by rainfall-triggered landslides. Dahal and Hasegawa (2008) used a  
125 dataset of 193 landslides occurring from 1951 to 2006, part of which were from the Koshi River basin, to generate a  
126 threshold relationship between rainfall intensity, rainfall duration, and landslide initiation.

127 The area was severely affected by the Gorkha earthquake, with a moment magnitude of 7.8 on 25 April 2015. The  
128 epicenter was located near Gorkha, which is about 80km west of the study area. A second major earthquake occurred  
129 along the same fault on 12 May 2015 with a moment magnitude of 7.3 with the epicenter located inside the Koshi

130 River basin. The second event is considered as a major aftershock of the main Gorkha earthquake. Both events  
 131 triggered many landslides (Collins and Jobson 2015; Kargel et al. 2016; Zhang et al. 2016; Martha et al. 2017b).  
 132

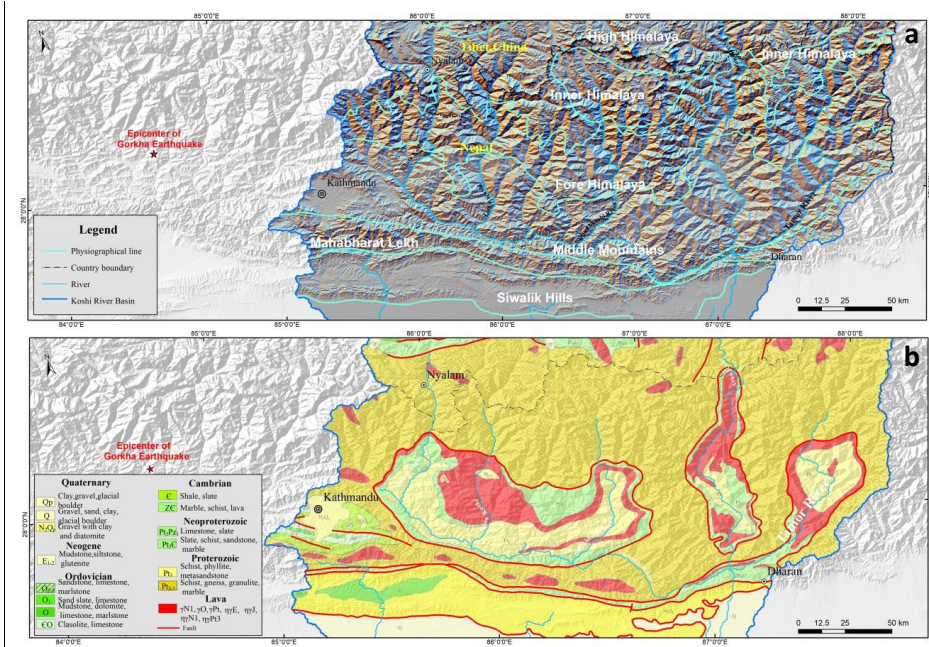

133  
 134 **Fig. 1** Maps showing the study area (a) Physiographic zones of the Koshi River basin; (b) Geological map showing the  
 135 main geological zones (Dhital, 2015; Zhang et al., 2016).  
 136

137 **3. Input data**

138 The study requires a series of landslide inventory maps, and contributing factor maps, which were generated for the  
 139 middle part of the Koshi basin, where most of the landslides were concentrated. Two landslide inventories were  
 140 generated: a pre-2015 inventory showing rainfall-triggered landslides, and a co-seismic landslide map for the 2015  
 141 Gorkha earthquake. The pre-2015 inventory map was generated using topographic maps, multi-temporal Google Earth  
 142 Pro images and Landsat ETM/TM images. We were able to digitize landslide polygons from the available 1:50,000  
 143 scale topographic maps, which cover only the Nepalese part of the Koshi River basin. These maps were generated  
 144 from aerial photographs acquired in 1992, and active landslides with a minimum size of 450 m<sup>2</sup> visible on these  
 145 images were marked as separate units. The landslides could not be separated in initiation and accumulation zones, and

also no classification of landslide types could be done, as this was not indicated on the topographic maps. A set of pre-2015 Landsat ETM/TM images were available for the entire study area, from which the post 1992 and pre-2015 landslides. Pre-2015 landslides were also mapped from historical images using Google Earth Pro Historical Imagery Viewer which contains images from 1984 onwards. Although the oldest images are Landsat images, the more recent ones have much higher resolution, although not covering the whole study area in equal level of detail. By comparing the different images for the period between 1992 and 2015 we were able to recognize most of the landslides. We carried out field verification for a number of samples and could conclude that through the image interpretation we were able to map landslide with a minimum size of 50 m<sup>2</sup>. Images from Google Earth were downloaded and geo-referenced and landslides were mapped using visual image interpretation and screen digitizing. A total of 5,858 rainfall induced landslides were identified in the Koshi River basin.

After the 2015 April 25<sup>th</sup> Gorkha earthquake, a substantially complete earthquake-triggered landslide inventory was created by Roback et al. (2017). They mapped landslides using high-resolution (<1m pixel resolution) pre- and post-event satellite imagery. In total 24,915 landslide areas were mapped, of which 14,022 landslides were located in the Koshi river basin. Chinese GaoFen-1 and GaoFen-2 satellites imageries (with 2.5m resolution) of the CNSA (China National Space Administration), which are part of the HDEOS (High-Definition Earth Observation Satellite) program, were employed to validate this landslide inventory. These images were captured during 27 April, 2015 to May 14 2015. Finally 15 landslide polygons were deleted, and 120 landslides were added to the inventory.

For the susceptibility assessment, we extracted the point located in the highest part of the landslides, as indicative of the initiation conditions. Different DEMs, such as ASTER GDEM, SRTM Digital Elevation Model with both 90 m and 30m spatial resolution, as well as ALOS PALSAR DEM were evaluated to use in this study. After careful analysis however, both ASTER GDEM and 30m SRTM contained many erroneous data points, ALOS PALSAR DEM with highest resolution of 12.5m, was utilized in this study. ESRI ArcGIS software enabled the calculation of topographical factors including slope gradient, aspect, and curvature. Streams and gullies were obtained through DEM processing, and the drainage density was calculated. The land cover dataset GlobeLand30 with 30×30m spatial resolution, developed by the National Geomatics Center of China, was employed in this study. The land cover types include cultivated land, forest, grassland, shrub land, wetland, water bodies, tundra, artificial surfaces and bare land. Geological maps of Nepal, and Tibet were obtained from Chengdu Geological Survey Center of the China Geological Survey. The Peak Ground Acceleration data for the Gorkha earthquake were obtained from USGS Shakemap, which was designed as a rapid response tool to portray the extent and variation of ground shaking throughout the affected region immediately following significant earthquakes (Wald et al., 1999). Given the rather low resolution of the input data, the relation with landslides as small as 50m<sup>2</sup> may not be optimal, especially also considering the rather long time period over which land cover changes have occurred in many areas. But given the regional scale of this analysis, the

178 use of higher resolution data was unfortunately not a viable option.

179 **4. Methods**

180 Figure 2 gives an overview of the method followed in this study. The landslide inventories were subdivided into  
181 training and test datasets. It is a generally accepted method in literature to separate the landslide dataset into a training  
182 and validation set (e.g. Hussin et al. 2016; Reichenbach et al., 2018), although the separation thresholds differs among  
183 authors. We decided to select 60% of the landslide data as training data for the modeling, and 40% for the validation.  
184 We examined the frequency-area distribution of the gathered inventories using the method described by Clauset et al.  
185 (2009). They proposed a numerical method to identify the slope of power-law distribution ( $\beta$ ) and the point where  
186 frequency-area distribution diverges from the power-law (cutoff point).

187 Based on the frequency area distribution the RTL and ETL inventories were separated in two size-groups each. Initially  
188 bivariate statistical analysis was used for the different types and sizes of landslides, to investigate the correlation  
189 between landslides with contributing factors. After selecting the relevant factors, the logistic regression method was  
190 used to build the susceptibility model for each size group. The Logistic Regression method is the most commonly used  
191 model in landslide susceptibility assessment (Ayalew and Yamagish 2005; Bai et al. 2010; Das et al. 2000; Nandi and  
192 Shakoor 2010; Wang et al. 2013). For the susceptibility modeling of RTL, the following factors were used: elevation  
193 ( $x_1$ ), slope gradient ( $x_2$ ), curvature ( $x_3$ ), slope aspect ( $x_4$ ), relative relief ( $x_5$ ), drainage density ( $x_6$ ), lithology ( $x_7$ ),  
194 distance to faults ( $x_8$ ), land cover type ( $x_9$ ), precipitation during monsoon( $x_{10}$ ). For the susceptibility modeling of ETL,  
195 precipitation during monsoon( $x_{10}$ ) was instead of peak ground acceleration ( $x_{10}$ ). The statistical software R developed  
196 at Bell Laboratories was used to build the models for different types and sizes of landslide respectively. ROC (Receiver  
197 Operating Characteristic) curves (Fawcett, 2006) were used to verify the accuracy of the susceptibility models, and  
198 finally six landslide susceptibility maps were generated and compared (Fig. 2).

批注 [h2]: Fawcett, Tom (2006); An introduction to ROC analysis, Pattern Recognition Letters, 27, 861–874

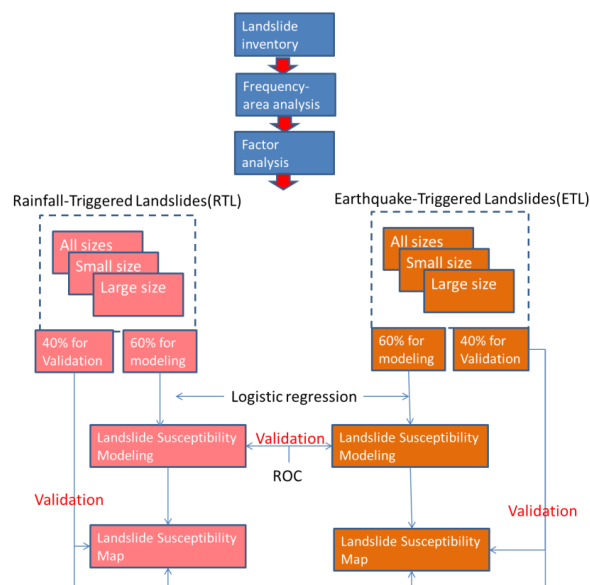

**Fig. 2** Methodology for susceptibility assessment to different types and sizes of landslide

## 5. Landslide characteristics

In the Koshi River basin, a total of 5,858 RTL were mapped. The Gorkha earthquake triggered more than 25,020 landslides, of which 14,127 were located in the Koshi River basin. Landslide characteristics were analyzed based on frequency-area distribution and factor statistics (Fig. 3).

批注 [h3]: Numbers of ETL were updated



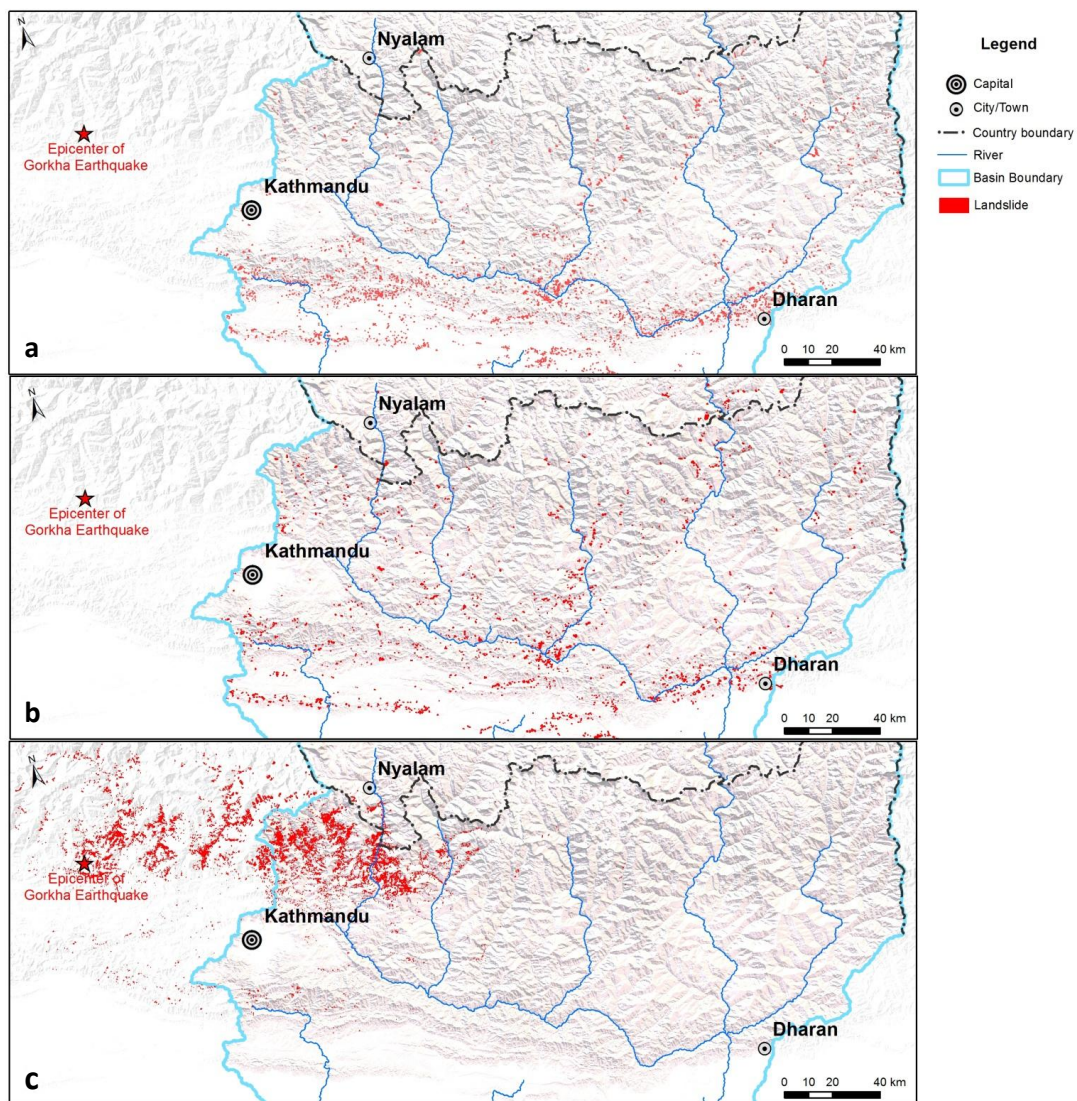

**Fig. 3** Landslide inventories of the Koshi River basin (a) Rainfall induced landslide inventory of events before 1992; (b) Rainfall induced landslide inventory for the period between 1992 to 2015; (c) Inventory of landslides triggered by the 2015 Gorkha earthquake(Roback et al. 2017).

批注 [h4]: Fig.3c was changed base on Roback's landslide inventory

## 210 5.1 Landslide frequency-area distributions

211 Size statistics of landslides are analyzed using frequency-area distribution curves of landslides (e.g., Malamud et al.,  
212 2004). There is a large literature arguing that frequency-area distribution of medium and large landslides has power-  
213 law distribution, which diverges from power-law towards smaller sizes (e.g., Hovius et al., 1997; 2000; Malamud et  
214 al., 2004). Given this argument, we can identify the divergence point of frequency-area distribution curve to determine  
215 a site specific threshold values referring to the limit between medium and small landslides.

216 The frequency-area distributions (FAD) of landslides were separately analyzed for both RTL and ETL inventories (Fig.  
217 4). For the RTL both landslide inventory datasets of before 1992 and 1992~2015 were analyzed (Fig. 4a). For the ETL  
218 of the Gorkha earthquake, landslides located in the Koshi River basin were analyzed separately from the entire  
219 landslide-affected area. We obtained similar  $\beta$  values for the RTL triggered before 1992 ( $\beta = 2.44$ ) and triggered from  
220 1992 to 2015 ( $\beta = 2.38$ ) (Fig. 4a). On the other hand, we observe larger differences between the  $\beta$  values obtained for  
221 ETL inventories created for both Koshi River basin and entire landslide-affected area (Fig. 4b).

222 We also examine the cutoff values of inventories. The historical RTL inventories and ETL inventory that we examined  
223 for both Koshi River basin and entire landslide-affected area gave similar cutoff values changing from 24,884 m<sup>2</sup> to  
224 32,913 m<sup>2</sup> (Fig. 4). This finding shows that, the limit between small and large landslides are consistently obtained from  
225 these inventories about 30,000 m<sup>2</sup>. Given this finding, the proposed landslide size classification system of China the  
226 Tong et al. (2013) seems like an acceptable approach for our study area. They proposed a classification with landslides  
227 with an area smaller than 10,000 m<sup>2</sup> as small, those with an area between 10,000 m<sup>2</sup> and 100,000 m<sup>2</sup> as medium, and  
228 those with larger sizes than 100,000 m<sup>2</sup> as large size landslide. Considering this study, and the cutoff values calculated  
229 in our study, 30,000 m<sup>2</sup> was picked as a threshold value for large landslides.

230  
231  
232

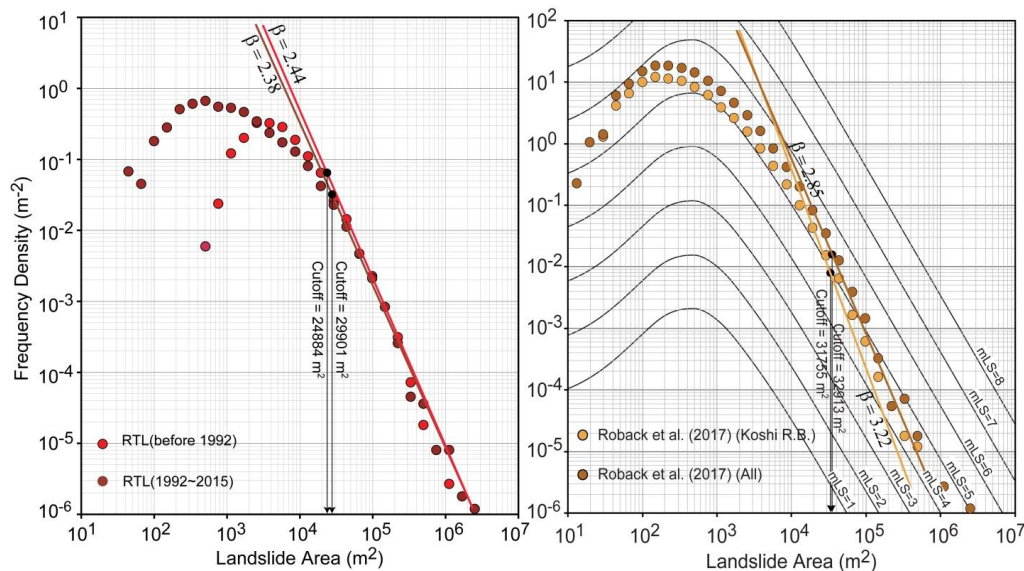

**Fig. 4** Landslide frequency - area distributions of (a) RTL inventories, (b) ETL inventories created for Koshi River basin and (c) ETL inventories created for the entire landslide-affected area of the 2015 Gorkha, Nepal earthquake (Roback's landslide inventory was validated). Cutoff and  $\beta$  values are calculated using the method proposed by Clausen et al. (2009).

Based on the results of the FAD analysis, that resulted in similar cutoff values for the RTL and ETL and similar  $\beta$  values, we subdivided them into two size-groups, with 30,000 m<sup>2</sup> as threshold value (Table 1). The results will therefore be more reliable for the class above the threshold of 30,000 m<sup>2</sup>, where under sampling is not an issue, then for the small landslide class, which has different rollover points, and completeness levels.

**Table 1** Numbers for different types and sizes of landslide in Koshi River basin

|            | Rainfall-triggered landslides (RTL) |            |            | Earthquake-triggered landslides (ETL) |            |            |
|------------|-------------------------------------|------------|------------|---------------------------------------|------------|------------|
|            | All sizes                           | Small size | Large size | All sizes                             | Small size | Large size |
| Total      | 5,858                               | 5267       | 591        | 14,127                                | 13981      | 146        |
| Modelling  | 3,515                               | 3160       | 355        | 8476                                  | 8388       | 88         |
| Validation | 2,343                               | 2107       | 236        | 5650                                  | 5593       | 58         |

批注 [h5]: Fig.4b the curves was redrawn base on validated landslide inventory of Roback's(2017)

批注 [h6]: Due to the change of threshold, the numbers of large size and small size of landslide also changed.

245

246

5.2 Correlation of landslides with contributing factors

247

In order to evaluate their relation with landslide occurrence the factor maps were analyzed using the Frequency Ratio method (Razavizadeh et al. 2017).

248

$$FR = \frac{E/F}{M/L}$$

249

where  $E$  is the area of landslides in the conditioning factor group,  $F$  is the area of landslides in the entire study area,  $M$  is the area of the conditioning factor group, and  $L$  is the entire study area. The analysis was carried out for different triggers and size groups, and each time two factors were combined (e.g. elevation with slope gradient, elevation with slope direction, lithology with slope gradient). The results are summarized in Fig. 5. Fig. 5a&b show that rainfall triggered landslides (RTL) are more frequent in low altitude areas then earthquake triggered landslides (ETL). However, it is important to keep in mind that the ETL is an event inventory of a single earthquake, where the epicenter was located at higher elevation (See Fig. 3) and the RTL is a multi-temporal inventory, showing the accumulated inventory of many individual events.

257

Fig. 5 c&d show the relation with slope and lithology. RTLs are concentrated on Proterozoic metamorphic lithological units (Pt3), consisting of schist, phyllite and metasandstone, and in Quanaternary molasse ( N2Qp ) units, consisting of gravel and clay (See Fig. 1). ETLs are linked to units consisting of shale and slate (Pt3e), and Cambrian units consisting of shale and slate (e) and marble, schist and lava (Ze).

261

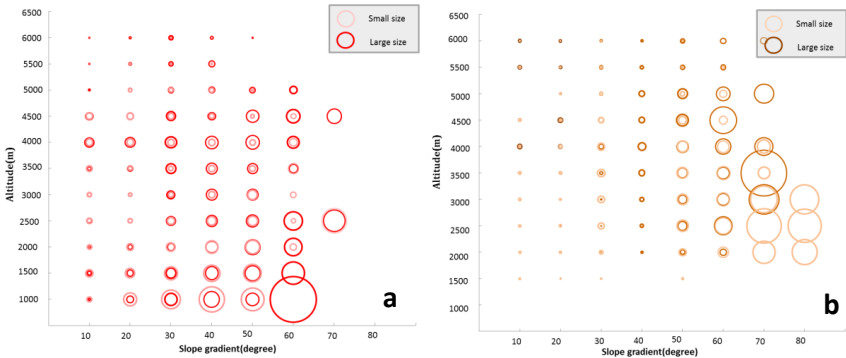

262

263

264

批注 [h7]: A new method, Frequency Ratio, was brought into this part, to analyze correlation of landslide with double contributing factors.

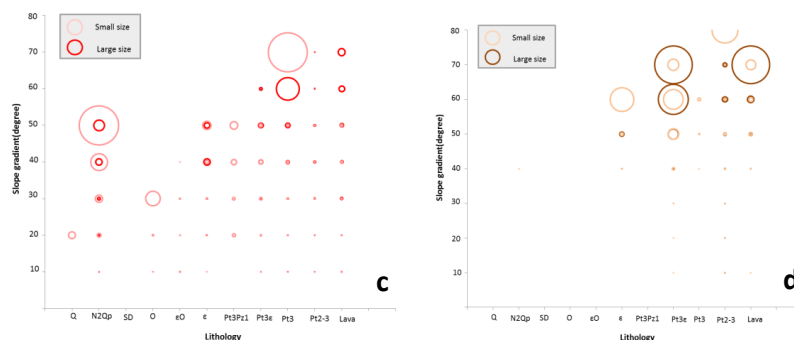

批注 [h8]: This figure was redrawn base on FR method.

批注 [h9]: Precipitation factor was added in the model

## 6. Landslide susceptibility assessment

### 6.1 Landslide susceptibility models

The following factors were used for the susceptibility modeling of RTL: altitude( $x_1$ ), slope gradient( $x_2$ ), curvature( $x_3$ ), slope aspect( $x_4$ ), relative relief( $x_5$ ), drainage density( $x_6$ ), lithology( $x_7$ ), distance to fault( $x_8$ ), land cover type( $x_9$ ) and precipitation during monsoon( $x_{10}$ ). Peak Ground Acceleration (PGA) was used instead of precipitation for the susceptibility modeling of ETL (Fig. 6). The R software was used to build the models by Logistic Regression method for different types and sizes of landslide respectively (Table 2). ROC curves were generated to verify the accuracy of each susceptibility model, and the Area Under Curve (AUC) was calculated (Table 2).

The coefficients for the contributing and triggering factors in the landslide susceptibility models show differences between triggers and different sizes of landslides. Curvature, altitude and slope gradient have a high impact on the susceptibility of RTL, while curvature, PGA, relative relief, and slope gradient have high impact on susceptibility of ETL. The size classes of RTL show larger differences in weight of curvature, relative relief and altitude. For ETL the difference between size classes are largest for factors of PGA, curvature, and relative relief.



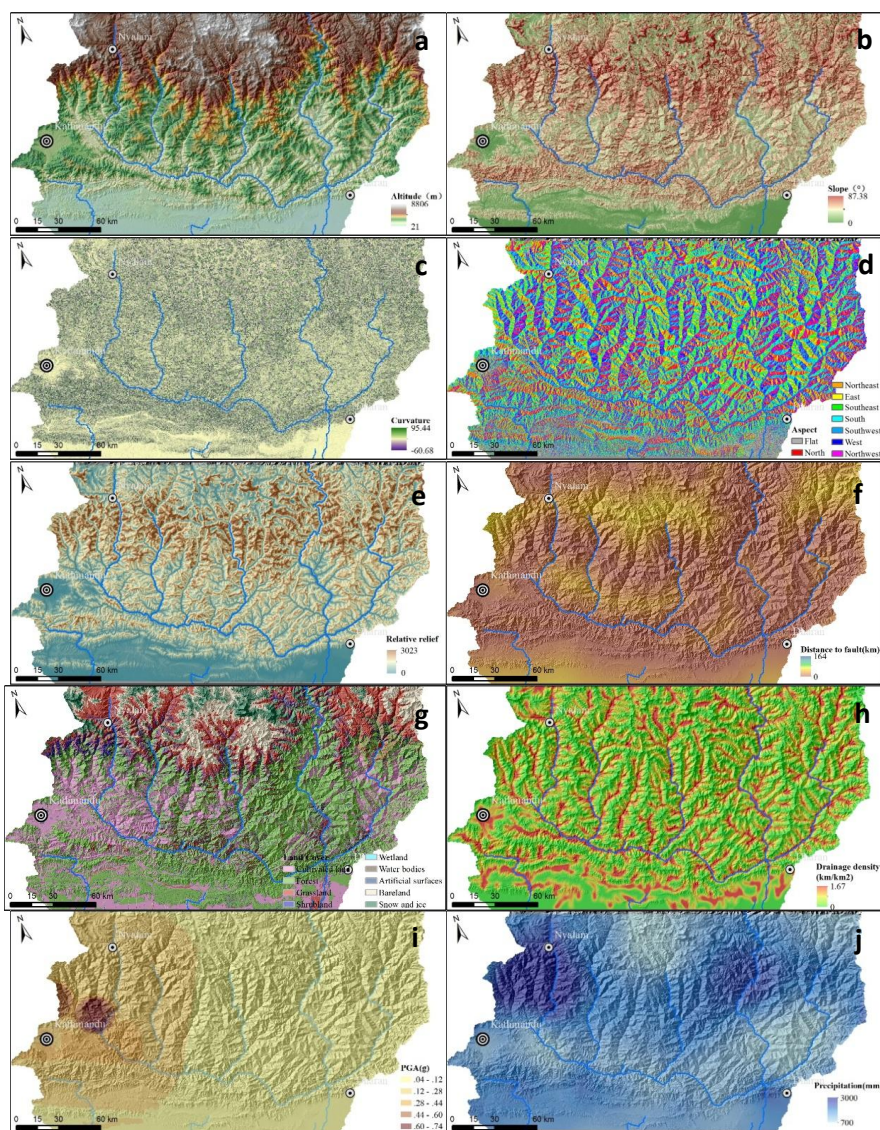

**Fig. 6** Landslide susceptibility assessing factors; a: altitude(Data source: JAXA/METI ALOS PALSAR DEM); b: slope gradient; c: slope curvature; d: slope direction; e: relative relief; f: distance to fault; g: land cover; h: drainage density; i: Peak Ground Acceleration of the 2015 Gorkha earthquake (Peak Ground Acceleration data for the Gorkha earthquake

293 were obtained from USGS Shakemap, which was designed as a rapid response tool to portray the extent and variation  
 294 of ground shaking throughout the affected region immediately following significant earthquakes); j: Average total  
 295 monsoon precipitation (ICIMOD and the National Meteorological information Center of China. This data is the  
 296 average precipitation for the period 1991-2010, for the monsoon season from June to October).

297  
 298 **Table 2** Susceptibility models for different triggers and landslide size classes in the Koshi River basin

| Landslide type | x <sub>1</sub> | x <sub>2</sub> | x <sub>3</sub> | x <sub>4</sub> | x <sub>5</sub> | x <sub>6</sub> | x <sub>7</sub> | x <sub>8</sub> | x <sub>9</sub> | x <sub>10</sub> | p        |
|----------------|----------------|----------------|----------------|----------------|----------------|----------------|----------------|----------------|----------------|-----------------|----------|
| All RTL        | - 6.4317       | 6.4955         | -12.2440       | - 0.1717       | -3.7048        | -1.3431        | 1.0590         | -0.7090        | 1.3725         | 0.7206          | 4.3961   |
| Small size RTL | - 8.36420      | 6.33158        | -1.37934       | - 0.09899      | -2.68158       | -1.91514       | 1.10489        | -0.93464       | 1.10003        | 0.98897         | -0.54775 |
| Large size RTL | - 4.93126      | 6.47043        | 7.03034        | - 0.30706      | 4.79661        | -0.13525       | 1.49649        | -0.49201       | 1.31034        | 0.07492         | -6.69787 |
| All ETL        | -3.3342        | 5.8510         | -8.6844        | -0.5513        | 8.8514         | 6.3296         | 3.2108         | -0.2472        | 1.3740         | 17.4360         | -6.4566  |
| Small size ETL | -7.4433        | 5.8410         | -7.5233        | -0.1974        | 5.9871         | 4.2647         | 2.6977         | 1.7495         | 1.2858         | 7.5676          | -3.3845  |
| Large size ETL | 6.939          | 10.116         | -26.355        | 3.660          | 16.503         | 11.678         | 3.962          | -4.039         | 2.633          | 28.199          | -11.445  |

299  
 300 ROC curves were drawn to verify the accuracy of each susceptibility model (Fig. 7), and the Area Under Curve (AUC)  
 301 was calculated. The AUC values of the ETL models were higher than for RTL, since the ETL were more concentrated  
 302 than the RTL, as the inventory is from one single triggering event, whereas the RTLs are from many different rainfall  
 303 events over a longer time period.

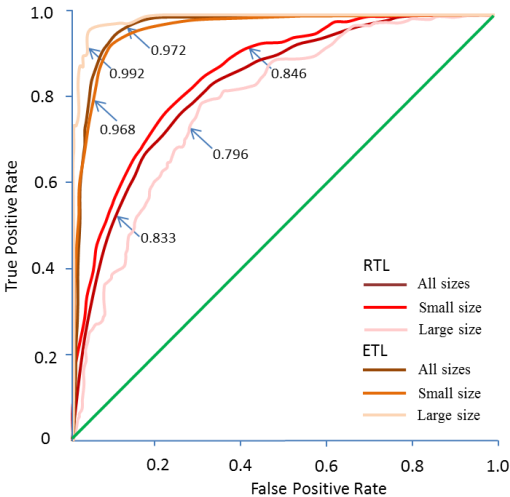

304  
 305 **Fig. 7** ROC curves for the susceptibility assessing models to different sizes of RTL and ETL

批注 [h10]: This new figure was added here, to show all the assessing factor for landslide susceptibility, with data source described.

批注 [h11]: Due to the change of threshold for small size and large size of landslide, the ETL inventory, as well as precipitation factor added for RTL, all the susceptibility models were calculated again.

批注 [h12]: The ROC curves were drawn for the new susceptibility models.

306  
307  
308  
309  
310  
311  
312  
313  
314  
315  
316  
317  
318  
319  
320  
321  
322  
323  
324  
325  
326  
327  
328  
329  
330  
331

6.2 Results

The logistic regression models were applied to the Koshi River basin and in total six susceptibility maps were generated (Fig. 8). Susceptibility values were classified into four levels: low, moderate, high and very high, based on the following susceptibility threshold values: 0-0.25, 0.25-0.5, 0.5-0.75 and 0.75-1.

The RTL susceptibility map (Fig. 8a) shows that high and very high susceptible are located mostly in the Siwaliks and in the Mahabharat Lekh region in west-eastern direction and the Middle to High Himalaya region in north-south direction. The Siwaliks and Mahabharat Lekh regions (Fig 1) have high and very high susceptibility levels for small landslides, and lower susceptibility levels for large ones. The Middle and High Himalaya region (Fig. 1) has a reverse situation: high and very high susceptibility levels for large landslides, and lower levels for small ones.

The ETL susceptibility map reflects the co-seismic landslide pattern of the Gorkha earthquake, with very high and high susceptibility in the western part of the Koshi River basin. It is important to note that the ETL susceptibility map only reflects the characteristics of the Gorkha earthquake and is therefore not a reliable map for future earthquakes that may have another epicentral location, length of fault ruptures and magnitudes.

Both ETL and RTL susceptibility maps show different patterns for the large size landslide class (Fig. 8 c and f), whereas the maps for small size (Fig 8 b and e) resemble those of all size classes (Fig 8 a and d). This is due to the relative small fraction of the large size landslides in comparison with the small ones, and their more restricted location, which gives different weight values for some factor maps (Table 2).

The highest susceptibility zones for small size and large size RTL show a large overlapping area, although the area of these classes is much smaller for large size RTL. In the Siwaliks and Mahabharat Lekh regions high and very high susceptibility zones for large size RTL are located in the upper steep hillslopes. In the Middle and High Himalaya region, the highest susceptibility zones for both small size and large size RTL are mostly located on steep slopes along rivers. The highest susceptibility zones for both small and large size ETL are located in the northwestern part of the Khoshi basin. For large size ETL these are concentrated in a smaller area to the northeast of Kathmandu (with altitude higher than 3000m) where small ETL also show high susceptibility in the southeast of Kathmandu.



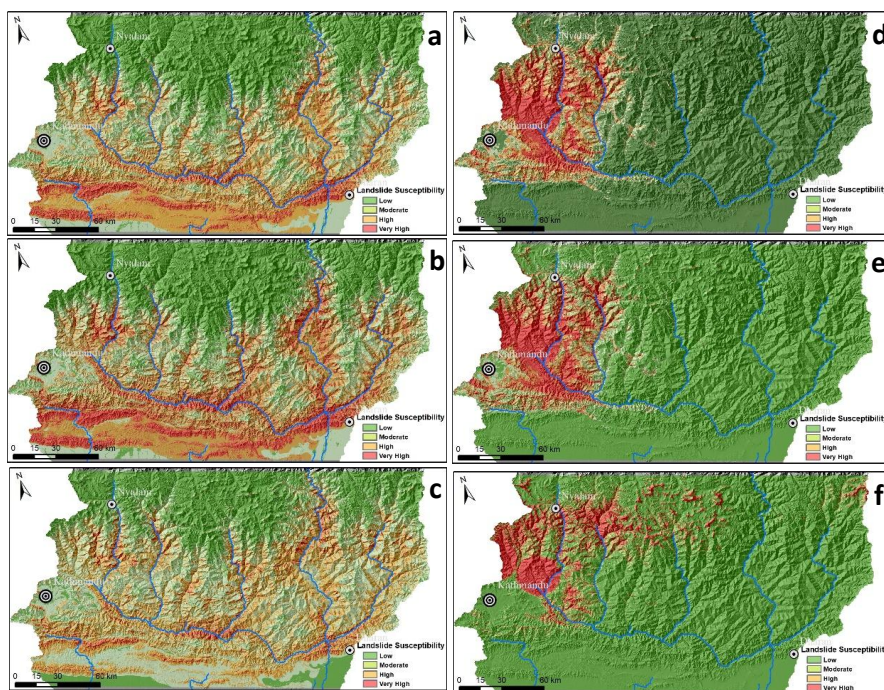

**Fig. 8** Susceptibility maps for different sizes of RTL and ETL: (a) for all RTLs; (b) for small RTLs; (c) for large RTLs; (d) for all ETLs; (e) for small ETLs; (f) for large ETLs.

批注 [h13]: All the susceptibility maps were redrawn according to the new models.

The areal coverage of the landslide susceptibility classes was calculated for each susceptibility map (Fig. 9). Compared to RTL, the ETL susceptibility maps have a larger area with low susceptibility, due to fact that the Koshi River basin is far from the epicenter of Gorkha earthquake, thus the earthquake affected region is only part of the basin. The very high and high susceptible region for ETL is mostly concentrated in the western and southwestern parts of the basin, clearly reflecting the PGA pattern (Fig 6i). The RTL susceptibility also reflects the triggering factor (monsoonal rainfall), with the highest susceptibility in the south of the basin. However, the higher rainfall peak in the Middle and High Himalaya region is less pronounced in the susceptibility maps, as well as in the inventory maps (Fig 3). The higher susceptibility classes for large ETL occupy more area than for small ETL, while the opposite can be observed for RTL.

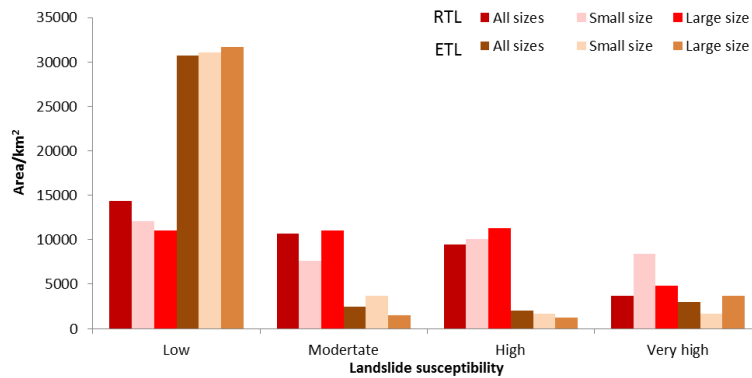

**Fig. 9** Coverage of different landslide susceptibility classes for ETL and RTL maps

批注 [h14]: This figure was redrawn base on the new susceptibility maps.

## 7. Validation of landslide susceptibility maps

Different groups of landslide data were used to validate the landslide susceptibility maps for RTL and ETL. For each trigger and size class, the number of landslides was calculated, inside the areas with a certain susceptibility level, to cross-validate the results.

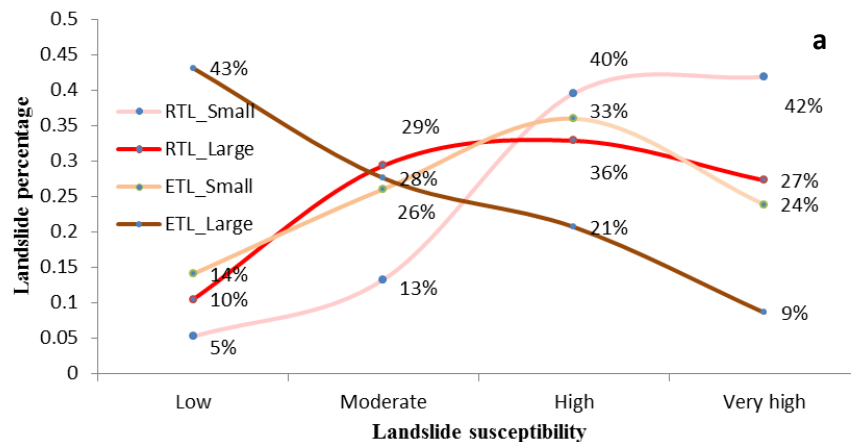

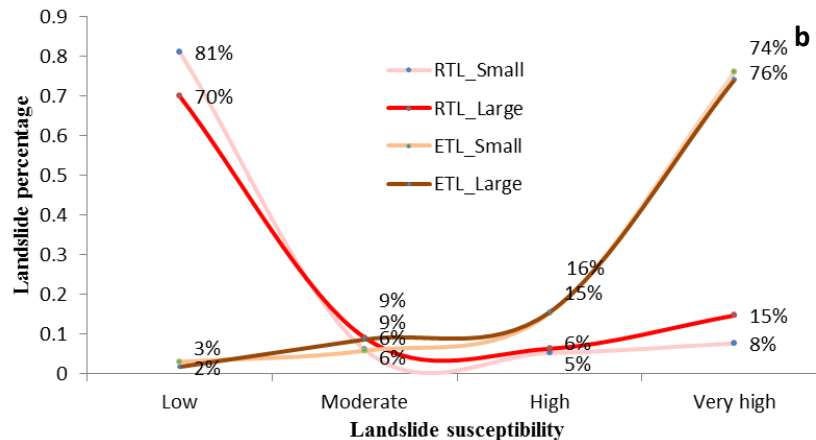

**Fig. 10** Cross validation of the landslide susceptibility maps. (a) The percentage of landslides in the various classes of the RTL susceptibility map. (b) The percentage of landslides in the various classes of the ETL susceptibility map.

批注 [h15]: This figure was redrawn

The percentages of different size RTLs and ETLs in each susceptibility are shown in Fig.10. For the RTL susceptibility map, percentages of of small size and large size landslides show a similar tendency, for both triggers. Most of the landslides were located in high and very high susceptibility zones. Only large size of ETL shows an opposite tendency. There is a marked difference between the percentages of ETL and RTL in the ETL landslide susceptibility classes. the RTL and ETL percentages show completely different patterns. Most of the RTLs (both small and large) are located in the low ETL susceptible regions. Conversely, a large fraction of small size and large size of ETLs are located in the high susceptible regions.

## 8. Discussion and conclusions

This study aimed to analyze independent rainfall- (RTL) and earthquake-triggered landslide (ETL) inventories for a large mountainous watershed in the Himalayas, located in India, Nepal and China. It is important to mention, that the two rainfall-triggered landslide inventories are not event-based inventories (Guzzetti et al., 2012 ). A major limitation in this work was that we were not able to use separate event-based inventories for RTLs, and only one event-based inventory for ETL. The collection of event-based inventories, both for rainfall and earthquake triggers, remains one of the main challenges in order to advance the study of landslide hazard at a watershed scale.

The two RTL inventories differ in the sense that the 1992 inventory is based on landslides that were large enough to be

377 mapped on the topographic map, where as the inventory between 1992 and 2015 represents the landslides that could be  
378 mapped from multi-temporal images over a number of years. Both inventories were lacking a separation into initiation  
379 and accumulation parts, and no separation in landslide types could be made. The effects of amalgamation of landslides  
380 might certainly have played a role in the Frequency Area Distribution (Marc and Hovius, 2015) although we are not  
381 able to quantify this, due to lack of an independent dataset. For the 1992-2005 dataset we were able to control this as  
382 we carried out the image interpretation ourselves, but the pre-1992 inventory could not be verified as the aerial  
383 photographs that were used to generate the updated topographic maps, were not available to us. Although the two  
384 inventories differ substantially with respect to the number of small landslides, it is striking to see that the cut-off  
385 values, and  $\beta$  values in the Frequency Area Distribution (FAD) are similar. It is very difficult to obtain a complete  
386 event-based landslide inventory for rainfall induced landslides in Nepal, as landslides are generally generated by a  
387 number of extreme rainfall events during the monsoon, which can not be separated, as the area is cloud-covered  
388 through most of the period. The earthquake triggered landslide distribution is an event-based inventory, for a single  
389 earthquake (2015 Gorkha) and based on an extensive mapping effort by Roback et al. (2017) resulting in an inventory  
390 that can be considered as complete (Tanyas et al., 2017a). When comparing the FAD for RTL and ETL it is striking  
391 that the size-frequency distributions for both ETL and RTL show very similar behaviour for landslides above the cut-  
392 off value of 30,000 m<sup>2</sup>. Although there is no concensus regarding the factors dictating the power-law distribution of  
393 landslides, there is an accumulating evidence that topography has to be one of an important controlling factors (e.g.,  
394 Liucci et al., 2017; Frattini and Crosta, 2013; ten Brink et al., 2009). Our finding regarding similar cutoff values  
395 obtained from different inventories created for the same area is also supporting this argument.

396 The pattern of the triggers (precipitation in the Monsoon for RTL, and PGA distribution for ETL) have major influence  
397 on the distribution of landslides and susceptibility zones. These trigger patterns differ substantially. When moist  
398 airflow from the India Ocean crosses over the Mahabharat Lekh, the intensity of precipitation reduces because the  
399 elevation lowers and temperature rises. As the airflow continues northwards to the Middle Mountains and Transition  
400 Belt, it rises again and consequently induces high precipitation in the area at an elevation between 2500~4000m. It  
401 results in two high precipitation regions during the monsoon season (Fig.6 i), which are reflected in the zones of high  
402 susceptibility to RTL. The precipitation pattern is different from the PGA distribution (Fig.6 j) for the Gorkha  
403 earthquake, with strong shaking area located in the North and North east of Kathmandu, with PGA values larger than  
404 0.44g.

405 The distribution of RTL and ETL susceptibility classes are also very different. As the ETL susceptibility map is based  
406 on a single event, the distribution of the susceptibility classes is controlled by the PGA for the 2015 Gorkha  
407 earthquake, and the patterns of the ETL susceptibility map differs from the RTL susceptibility map. This was

confirmed by the cross validation (Fig. 9), which showed that the RTL susceptibility map has a modest capability of explaining the ETL pattern, but that the ETL susceptibility cannot properly predict the RTLs. This means one should be careful with using susceptibility maps that were made for earthquake induced landslides, as prediction tools for rainfall induced landslides. Such maps are in fact of little practical implication, as the next earthquake may not be likely to occur in the same location and therefore produce a similar landslide pattern. The generation of ETL susceptibility maps should not be based on single earthquake scenario scenarios (Jibson, 2011), and ideally many earthquake scenarios should be used to model the overall ETL susceptibility. However, using PGA values based on probabilistic seismic hazard assessment might result in relatively poor statistical correlations with event-based inventories. Therefore, PGA maps and ETL inventories of specific earthquake scenarios are required to improve the statistical models. This requires more event-based ETL inventories, and efforts to generate worldwide digital databases should be encouraged (Tanyas et al., 2017a).

The relationship between ETL and RTL might also change over time. In the years after the occurrence of an earthquake, rainfall triggered landslide patterns tend to follow those of the coseismic landslides, as was demonstrated for example in the 2008 Wenchuan earthquake (Tang et al., 2016) and other areas (Marc et al., 2015). Rainfall-induced landslide activity is generally much higher in the first years after an earthquake, and generally decreases to pre-earthquake levels within a decade, due to depletion of co-seismic sediments, progressive coarsening of available sediments and revegetation (Fan et al., 2018b; Hovius et al., 2011; Marc et al., 2015). Landslide susceptibility map should also be updated after major earthquakes.

Both ETL susceptibility maps and RTL susceptibility maps show different patterns for large landslides, as compared to the small landslide or all landslides. In general the susceptibility maps, for both RTL and ETL, for all landslide sizes together show a large similarity with the ones for the small landslides only. This is due to the fact that the number of large landslides is quite limited as compared to the small landslides (See Table 1), and the samples used for generation of the models for all landslides and only small landslides are almost the same. However, the resulting susceptibility patterns are quite different, and it is therefore questionable whether landslide susceptibility maps that are generated for all landslide sizes would be able to accurately predict the large landslides. More emphasis should be given to the evaluation of landslide size in susceptibility and subsequent hazard and risk assessment. This is relevant for analyzing the potential runout areas of landslides and for evaluation of landslide damming susceptibility (Fan et al., 2014; 2018b). Therefore, size and trigger matter in landslide susceptibility assessment.

436

## 437 9. Acknowledgements

438 This research was supported by the National Natural Science Foundation of China (Grant No.41401007), the External  
439 Cooperation Program of BIC, Chinese Academy of Sciences (Grant No. 131551KYSB20130003). This study was also

jointly supported by the Australian government funded Koshi Basin Programme at ICIMOD as well as ICIMOD's core funds contributed by the governments of Afghanistan, Australia, Austria, Bangladesh, Bhutan, China, India, Myanmar, Nepal, Norway, Pakistan, Switzerland, and the United Kingdom.

## References

- Ayalew L and Yamagishi H (2005) The application of GIS-based logistic regression for landslide susceptibility mapping in the Kakuda-Yahiko Mountains, Central Japan. *Geomorphology* 65(1–2): 15–31. doi:10.1016/j.geomorph.2004.06.010
- Bai S, Wang J, Lü GN, Zhou PG, Hou SS and Xu SN (2010) GIS-based logistic regression for landslide susceptibility mapping of the Zhongxian segment in the Three Gorges area, China. *Geomorphology* 115(1–2): 23–31. doi:10.1016/j.geomorph.2009.09.025
- Burg JP, Guiraud M, Chen GM and Li GC (1984) Himalayan metamorphism and deformations in the North Himalayan Belt (southern Tibet, China). *Earth Planet Sci Lett* 69:391–400.
- Chang KT, Chiang SH and Hsu ML (2007) Modeling typhoon- and earthquake-induced landslides in a mountainous watershed using logistic regression. *Geomorphology* 89(3–4): 335–347. doi:10.1016/j.geomorph.2006.12.011
- Clauset A, Shalizi CR and Newman ME (2009) Power-law distributions in empirical data. *SIAM Review* 51(4): 661–703. <https://doi.org/10.1137/070710111>
- Collins BD and Jibson RW (2015) Assessment of existing and potential landslide hazards resulting from the April 25, 2015 Gorkha, Nepal earthquake sequence. U.S. Geological Survey OpenFile Report 2015-1142, Reston, VA
- Dai FC and Lee CF (2001) Frequency-volume relation and prediction of rainfall-induced landslides. *Engineering Geology* 59(3–4): 253–266. doi:10.1016/S0013-7952(00)00077-6
- Dahal RK and Hasegawa S (2008) Representative rainfall thresholds for landslides in the Nepal Himalaya. *Geomorphology* 100 (3–4): 429–443. doi:10.1016/j.geomorph.2008.01.014
- Das I, Sahoo S, van Westen CJ, Stain A and Hack R (2000) Landslide susceptibility assessment using logistic regression and its comparison with a rock mass classification system, along a road section in the northern Himalayas (India). *Geomorphology* 114(4): 627–637, doi:10.1016/j.geomorph.2009.09.023
- Dhital MR (2015) *Geology of the Nepal Himalaya, Regional Perspective of the Classic Collided Orogen*, Springer, Switzerland. doi:10.1007/978-3-319-02496-7
- Dilley M, Chen RS, Deichmann U, Lerner-Lam AL and Arnold M (2005) *Natural disaster hotspots: a global risk analysis*, The World Bank Hazard Management Unit, Washington

471 Fawcett T (2006); An introduction to ROC analysis. *Pattern Recognition Letters* 27:861–874

472 Fan X Y, Qiao J P, Meng H, et al. (2012) Volumes and movement distances of earthquake and rainfall-induced  
473 catastrophic landslides. *Rock & Soil Mechanics*, 33(10):3051-3058.

474 Fan X, Rossiter DG, van Westen CJ, Xu Q and Görüm T (2014) Empirical prediction of coseismic landslide dam  
475 formation: coseismic landslide dam formation. *Earth Surf. Process. Landf.* 39: 1913–1926

476 Fan X, Domènech G, Scaringi G, Huang R, Xu Q, Hales T C, Dai L, Yang Q and Francis O (2018a) Spatio-temporal  
477 evolution of mass wasting after the 2008 Mw 7.9 Wenchuan Earthquake revealed by a detailed multi-temporal  
478 inventory. *Landslides*. doi: 10.1007/s10346-018-1054-5, 2018

479 Fan X, Juang CH, Wasowski J, Huang R, Xu Q, Scaringi G, van Westen CJ and Havenith H-B (2018b). What we have  
480 learned from the 2008 Wenchuan Earthquake and its aftermath: A decade of research and challenges. *Eng. Geol.*  
481 241: 25–32

482 Frattini P and Crosta GB (2013) The role of material properties and landscape morphology on landslide size  
483 distributions. *Earth and Planetary Science Letters* 361: 310-319. doi: 10.1016/j.epsl.2012.10.029

484 Froude MJ and Petley DN (2018) Global fatal landslide occurrence from 2004 to 2016. *Natural Hazards and Earth*  
485 *System Sciences*, 18: 2161-2181

486 Gansser A (1964) *Geology of the Himalayas*, Interscience, New York

487 Gurung HB and Khanal NR (1987) *Landscape processes in the Chure range*, Nepal National Committee for Man and  
488 the Biosphere, Kathmandu

489 Guzzetti F, Ardizzone F, Cardinali M, Rossi M and Valigi D (2008) Landslide volumes and landslide mobilization rates  
490 in Umbria, central Italy. *Earth and Planetary Science Letters* 279(3-4): 222-229. doi:10.1016/j.epsl.2009.01.005

491 Guzzetti F, Mondini AC, Cardinali M, Fiorucci F, Santangelo M, and Chang K –T (2012) Landslide inventory maps:  
492 New tools for an old problem. *Earth-Science Reviews*, 112(1), 42-66

493 Haque U, Blum P, da Silva PF, Andersen P, Pilz J, Chalov SR, Malet J-P, Auflič MJ, Andres N, Royiadji E, Lamas PC,  
494 Zhang W and Peshevski I (2016) Fatal landslides in Europe. *Landslides* 13(6): 1545–1554. doi:10.1007/s10346-  
495 016-0689-3

496 Highland LM and Bobrowsky P (2008) *The landslide handbook-A guide to understanding landslides*: Reston, Virginia,  
497 U.S. Geological Survey Circular 1325, 129 p.

498 Hodges KV, Parrish RR and Searle MP (1996) Tectonic evolution of the central Annapurna Range, Nepalese Himalaya.  
499 *Tectonics*, 15:1264-1291

500 Hovius N, Stark CP and Allen PA (1997) Sediment flux from a mountain belt derived by landslide mapping. *Geology*  
501 25(3): 231–234. [https://doi.org/10.1130/0091-7613\(1997\)025%3C0231:SFFAMB%3E2.3](https://doi.org/10.1130/0091-7613(1997)025%3C0231:SFFAMB%3E2.3).

502 Hovius N, Stark CP, Hao-Tsu C and Jiun-Chuan L (2000) Supply and removal of sediment in a landslide-dominated

503 mountain belt: Central Range, Taiwan. *The Journal of Geology* 108(1): 73–89. <https://doi.org/10.1086/314387>.

504 Hovius N, Meunier P and Ching-weei L (2011) Prolonged seismically induced erosion and the mass balance of a large  
505 earthquake. *Earth Planet. Sci. Lett.* 304: 347–355

506 Hussin HY, Zumpano V, Reichenbach P, Sterlacchini S, Micu M, van Westen CJ and Balteanu D (2016) Different  
507 landslide sampling strategies in a grid - based bi - variate statistical susceptibility model. *Geomorphology* 253:  
508 508-523

509 Jibson RW (2011) Methods for assessing the stability of slopes during earthquakes-A retrospective. *Eng. Geol.* 122:  
510 43–50

511 Kargel J, Leonard G, Shugar D. et al. (2016) Geomorphic and geologic controls of geohazards induced by Nepal's  
512 2015 Gorkha earthquake. *Science* 351(6269), aac8353. doi:10.1126/science.aac8353

513 Keefer DK (2002) Investigating landslides caused by earthquakes—a historical review. *Surv. Geophys.* 23:473-510

514 Kirschbaum D, Stanley T, and Zhou Y (2015) Spatial and temporal analysis of a global landslide catalog.  
515 *Geomorphology* 249:4-15

516 Klar A, Aharonow E, Kalderon-Asael B and Katz O (2011) Analytical and observational relations between landslide  
517 volume and surface area. *Journal of Geophysical Research* 116(F2): 1-10. doi:10.1029/2009JF001604

518 Korup O, Clague JJ, Hermanns RL, Hewitt K, Strom AL and Weidinger JT (2007) . Giant landslides topography and  
519 erosion. *Earth Planet. Sci. Lett.* 261, 578 – 589.

520 Larsen IJ and Montgomery DR (2012) Landslide erosion coupled to tectonics and river incision. *Nature Geoscience*  
521 5(7), 468–473. doi:10.1038/ngeo1479

522 Larsen IJ, Montgomery DR, Korup O (2011) Landslide erosion controlled by hillslope material. *Nature Geoscience*  
523 3(4), 247-251. doi:10.1038/ngeo776

524 Li G, West A J, Densmore A L, Jin Z, Parker R N, and Hilton R G (2014), Seismic mountain building: Landslides  
525 associated with the 2008 Wenchuan earthquake in the context of a generalized model for earthquake volume  
526 balance, *Geochem. Geophys. Geosyst.*, 15, 833–844, doi: 10.1002/2013GC005067.

527 Lin CW, Liu SH, Lee SY, Liu CC (2006) Impacts of the Chi-Chi earthquake on subsequent rainfall-induced landslides  
528 in central Taiwan. *Engineering Geology* 86(2-3): 87–101. doi:10.1016/j.enggeo.2006.02.010

529 Lin GW, Chen H, Hovius N, Horng MJ, Dadson S, Meunier P and Lines M (2008) Effects of earthquake and cyclone  
530 sequencing on landsliding and fluvial sediment transfer in a mountain catchment, *Earth Surf. Proc. Land.* 33:  
531 1354-1373

532 Liucci L, Melelli L, Suteanu C, Ponziani F (2017) The role of topography in the scaling distribution of landslide areas:  
533 A cellular automata modeling approach. *Geomorphology* 290: 236-249. doi:  
534 <https://doi.org/10.1016/j.geomorph.2017.04.017>



535 Pellicani R and Spilotro G (2015) Evaluating the quality of landslide inventory maps: comparison between archive and  
 536 surveyed inventories for the Daunia region (Apulia, Southern Italy). *Bulletin of Engineering Geology and the*  
 537 *Environment* 74(2): 357-367  
 538 Peng L, Xu S, Peng J (2014). Research on development characteristics and size of landslide in the Three Gorges area.  
 539 *Geoscience* 28(5): 1077-1086  
 540 Petley D (2012) Global patterns of loss of life from landslides. *Geology* 40: 927–930.doi:10.1130/G33217.1  
 541 Malamud BD, Turcotte DL, Guzzetti F and Reichenbach P (2004) Landslide inventories and their statistical properties.  
 542 *Earth Surf. Process. Landform* 29:687-711. doi:10.1002/esp.1064  
 543 Marc O, Hovius N, Meunier P, Uchida T and Hayashi S (2015). Transient changes of landslide rates after earthquakes.  
 544 *Geology* 43, 883–886  
 545 Marc O and Hovius N (2015). Amalgamation in landslide maps: effects and automatic detection. *Nat. Hazards Earth*  
 546 *Syst. Sci.* 15:723–733  
 547 Marc O, Hovius N, Meunier P, et al. (2015) Transient changes of landslide rates after earthquakes. *Geology* 43(10):  
 548 883-886  
 549 Martha TR, Reddy PS, Bhatt CM, Govindha Raj KB, Nalini J, Padmanabha A, Narender B, Kumar KV,  
 550 Muralikrishnan S, Rao GS, Diwakar PG and Dadhwal VK(2017a) Debris volume estimation and monitoring of  
 551 Phuktal river landslide-dammed lake in the Zaskar Himalayas, India using Cartosat-2 images. *Landslides*  
 552 14(1): 373-383. doi: 10.1007/s10346-016-0749-8  
 553 Martha TR, Roy P, Mazumdar R, Govindharaj KB and Kumar KV(2017b) Spatial characteristics of landslides  
 554 triggered by the 2015 Mw 7.8 (Gorkha) and Mw 7.3 (Dolakha) earthquakes in Nepal. *Landslides* 14(2): 697–  
 555 704. doi:10.1007/s10346-016-0763-x  
 556 Meunier P, Hovius N and Haines JA (2008) Topographic site effects and the location of earthquake induced landslides.  
 557 *Earth and Planetary Science Letters* 275(3-4): 221-232. doi:10.1016/j.epsl.2008.07.020  
 558 Nandi A and Shakoor A (2010) A GIS-based landslide susceptibility evaluation using bivariate and multivariate  
 559 statistical analyses. *Engineering Geology* 110(1–2): 11-20. doi:10.1016/j.enggeo.2009.10.001  
 560 Razavizadeh S, Solaimani K, Massironi M and Kavian A (2017) Mapping landslide susceptibility with frequency ratio,  
 561 statistical index, and weights of evidence models: a case study in northern Iran. *Environmental Earth Sciences*  
 562 76(14), 499  
 563 Reichenbach P, Rossi M, Malamud BD, Mihir M and Guzzetti F (2018) A review of statistically-based landslide  
 564 susceptibility models. *Earth-Science Reviews* 180: 60-91  
 565 Roback K, Clark MK, West AJ , Zekkos D, Li G, Gallen SF, Champlain D, and Godt JW (2017) Map data of  
 566 landslides triggered by the 25 April 2015 Mw 7.8 Gorkha, Nepal earthquake: U.S. Geological Survey data

release, <https://doi.org/10.5066/F7DZ06F9>.

Saba SB, van der Meijde M and van der Werff H. (2010) Spatio-temporal landslide detection for the 2005 Kashmir earthquake region. *Geomorphology* 124: 17-25

SafeLand (2015) Guidelines for landslide susceptibility, hazard and risk assessment and zoning, <https://www.ngi.no/eng/Projects/SafeLand>

Stark CP and Hovius N (2001) The characterization of landslide size distributions. *Geophysical Research Letters* 28: 1091-1094

Tang C, Zhu J and Qi X (2010) Landslide hazard assessment of the 2008 Wenchuan earthquake: a case study in Beichuan area. *Canadian Geotechnical Journal* 48(1): 128-145. doi:10.1139/T10-059

Tang C, van Westen CJ, Tanyas H and Jetten VG (2016) Analysing post-earthquake landslide activity using multi-temporal landslide inventories near the epicentral area of the 2008 Wenchuan earthquake. *Nat. Hazards Earth Syst. Sci.* 16: 2641-2655. doi:10.5194/nhess-16-2641-2016

Tanyas H, van Westen, CJ, Allstadt KE, Jesse MA, Gorum T, Jibson RW, Godt JW, Sato HP, Schmidt RG, Marc O and Hovius N (2017a) Presentation and Analysis of a World-Wide Database of Earthquake-Induced Landslide Inventories. *Journal of Geophysical Research: Earth Surface* 122: 1991-2015

Tanyas H, van Westen CJ and Allstadt KE (2017b) New method for estimation of landslide-event magnitude based on large dataset of earthquake-induced landslides. *Earth Surface Processes and Landforms* (Accept)

ten Brink US, Barkan R, Andrews BD and Chaytor JD (2009) Size distributions and failure initiation of submarine and subaerial landslides. *Earth and Planetary Science Letters* 287: 31-42. doi: 10.1016/j.epsl.2009.07.031

Tong L, Qi S, An G and Liu C (2013) Large scale geo-hazards investigation by remote sensing in Himalayan region, Science Press, Beijing (in Chinese)

Wald DJ, Quitoriano V, Heaton TH and Kanamori H (1999) Relationship between Peak Ground Acceleration, Peak Ground Velocity, and Modified Mercalli Intensity for Earthquakes in California. *Earthquake Spectra*. <http://earthquake.usgs.gov/shakemap/global/shake/about.html#references>

Wang L, Sawada K and Moriguchi S (2013) Landslide susceptibility analysis with logistic regression model based on FCM sampling strategy. *Computers & Geosciences* 57: 81-92. doi:10.1016/j.cageo.2013.04.006

Zhang J, Gurung DR, Liu RK, Murthy MSR and Su FH (2015) Abe Barek landslide and landslide susceptibility assessment in Badakhshan Province, Afghanistan. *Landslides* 12(3): 597-609. doi: 10.1007/s10346-015-0558-5

Zhang J, Liu R, Deng W, Khanal NR, Gurung DR, Murthy MSR and Wahid S (2016) Characteristics of landslide in Koshi River basin, central Himalaya. *Journal of Mountain Science* 13(10):1711-1722. doi :10.1007/s11629-016-4017-0
